# Supplementary material
Source: publisher site journal article supplement (https://www.spandidos-publications.com/7483/downloadSupplementary)

Figure S1. (A) Structure of the GABA<sub>B</sub> receptor extracellular Venus flytrap domain (PDB ID, 4MS4). (B) Docked conformation of baclofen in the GABA<sub>B</sub> receptor is shown. Interacting residues of the GABA<sub>B</sub> receptor are represented as dashed lines and labeled. GABA<sub>B</sub>,  $\gamma$ -aminobutyric acid B.

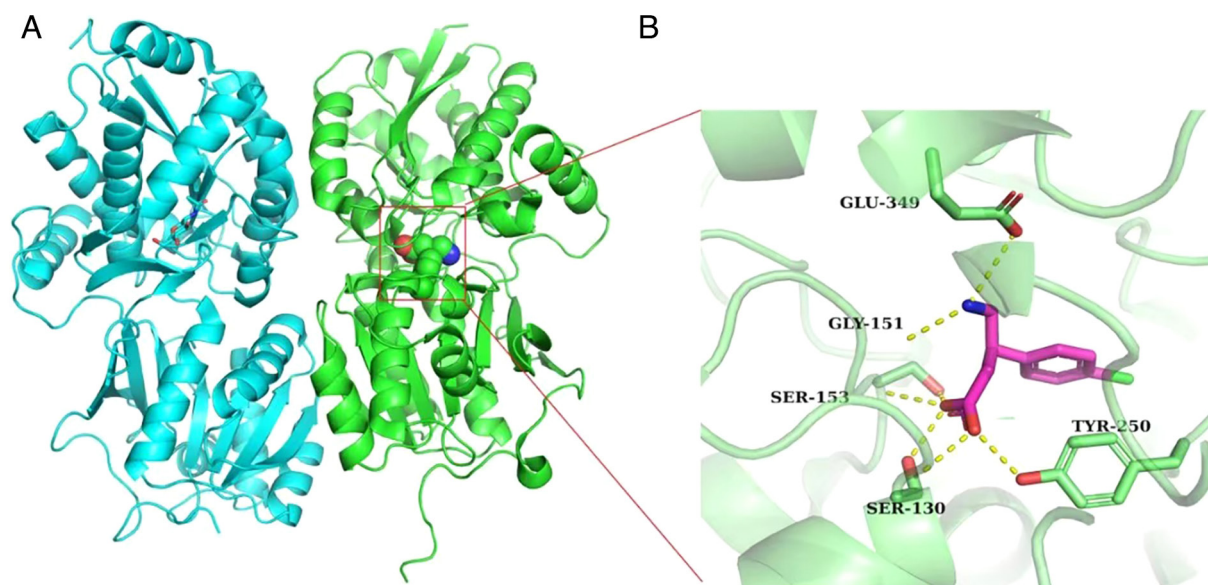

Figure S2. Docked conformations of the three selected compounds superimposed on to baclofen. The colors represent the following: Baclofen, green; compound with PubChem ID 450432, magenta; compound with ID 6448, blue; and compound with ID 6057, orange.

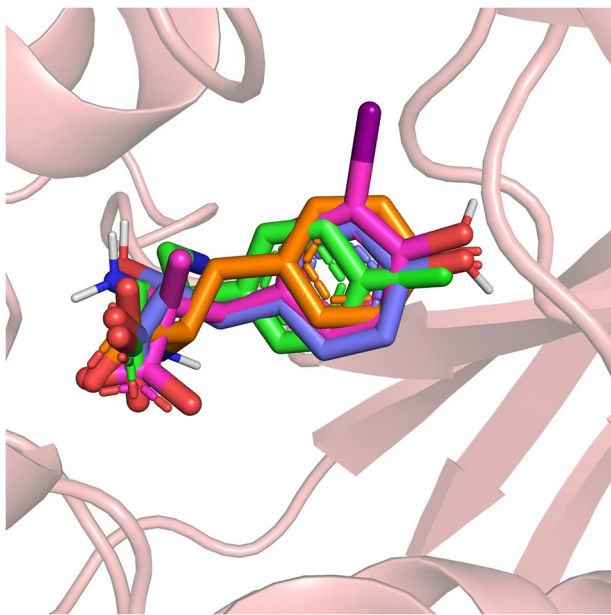

Supplement: Supplementary file 1 [file downloadSupplementary]
